# Supplementary material
Source: PubMed Central journal article supplement (PMC3196113)
Supplement: supp_M111.270561_jbc.M111.270561-1.pdf [file supp_M111.270561_jbc.M111.270561-1.pdf]

## Supplementary Tables

**Supplementary Table 1. Characteristics of HCC Patients Used for Survival Analysis**

| P. No. | Age | Sex | HBV    |        |        |        |        |        | HCV Ab | Liver Cirrhosis | HCC         |                    |      |  |
|--------|-----|-----|--------|--------|--------|--------|--------|--------|--------|-----------------|-------------|--------------------|------|--|
|        |     |     | HB sAg | HB sAb | HB eAg | HB eAb | HB cAb | Source |        |                 | TNM Staging | Histological Grade | AFP  |  |
| 1      | 36  | M   | —      | +      | —      | +      | —      | —      | +      | primary HCC     | T1 N0 M0    | II                 | ++   |  |
| 2      | 35  | M   | +      | —      | —      | +      | +      | —      | +      | primary HCC     | T1 N0 M0    | II                 | ++++ |  |
| 3      | 33  | F   | +      | —      | —      | +      | +      | —      | —      | primary HCC     | T1 N0 M0    | II                 | ++++ |  |
| 4      | 32  | M   | +      | —      | —      | +      | +      | —      | +      | primary HCC     | T1 N0 M0    | III                | +    |  |
| 5      | 51  | M   | +      | —      | —      | +      | +      | —      | +      | primary HCC     | T1 N0 M0    | III                | ++   |  |
| 6      | 67  | M   | +      | —      | —      | +      | +      | —      | —      | primary HCC     | T1 N0 M0    | I                  | —    |  |
| 7      | 43  | M   | +      | —      | —      | +      | +      | —      | +      | primary HCC     | T2 N0 M0    | II                 | +++  |  |
| 8      | 64  | M   | +      | —      | —      | +      | +      | —      | +      | primary HCC     | T1 N0 M0    | II                 | —    |  |
| 9      | 57  | M   | +      | —      | —      | +      | +      | —      | +      | primary HCC     | T1 N0 M0    | II                 | —    |  |
| 10     | 60  | M   | —      | —      | —      | —      | —      | —      | —      | primary HCC     | T1 N0 M0    | II                 | —    |  |
| 11     | 55  | F   | +      | —      | —      | +      | +      | —      | —      | primary HCC     | T3 N1 M0    | II                 | +    |  |
| 12     | 36  | M   | +      | —      | —      | +      | +      | —      | —      | primary HCC     | T3 N2 M0    | II                 | —    |  |
| 13     | 37  | M   | +      | —      | +      | —      | +      | —      | +      | primary HCC     | T1 N0 M0    | III                | ++++ |  |
| 14     | 36  | M   | +      | —      | —      | +      | +      | —      | +      | primary HCC     | T1 N0 M0    | II                 | —    |  |
| 15     | 53  | M   | +      | —      | —      | +      | +      | —      | +      | primary HCC     | T1 N0 M0    | I                  | —    |  |
| 16     | 71  | M   | +      | —      | +      | —      | +      | —      | +      | primary HCC     | T1 N0 M0    | I                  | —    |  |
| 17     | 30  | M   | +      | —      | +      | —      | +      | —      | +      | primary HCC     | T1 N0 M0    | II                 | —    |  |

|    |    |   |   |   |   |   |   |   |   |                |             |     |      |
|----|----|---|---|---|---|---|---|---|---|----------------|-------------|-----|------|
| 18 | 71 | M | + | - | - | + | + | - | + | primary<br>HCC | T3 N2<br>M0 | I   | -    |
| 19 | 42 | M | + | - | - | + | + | - | + | primary<br>HCC | T3 N1<br>M0 | III | +++  |
| 20 | 58 | M | + | - | - | + | + | - | + | primary<br>HCC | T1 N0<br>M0 | II  | -    |
| 21 | 49 | M | + | - | - | - | - | - | + | primary<br>HCC | T3 N1<br>M0 | III | +    |
| 22 | 40 | M | + | - | - | + | + | - | - | primary<br>HCC | T3 N1<br>M0 | III | +++  |
| 23 | 52 | F | + | - | + | - | + | - | + | primary<br>HCC | T3 N3<br>M0 | II  | ++++ |
| 24 | 59 | M | + | - | - | + | + | - | + | primary<br>HCC | T2 N0<br>M0 | II  | -    |
| 25 | 55 | M | - | - | - | - | - | + | + | primary<br>HCC | T3 N2<br>M0 | IV  | +    |
| 26 | 27 | M | + | - | - | + | + | - | + | primary<br>HCC | T1 N0<br>M0 | III | -    |
| 27 | 34 | M | + | - | - | + | + | - | + | primary<br>HCC | T1 N0<br>M0 | III | -    |
| 28 | 51 | M | + | - | - | + | + | - | + | primary<br>HCC | T3 N1<br>M0 | III | ++++ |
| 29 | 54 | M | + | - | - | + | + | - | + | primary<br>HCC | T3 N1<br>M0 | II  | ++++ |
| 30 | 52 | F | + | - | - | + | + | - | + | primary<br>HCC | T1 N0<br>M0 | III | ++++ |
| 31 | 42 | M | + | - | - | + | + | - | + | primary<br>HCC | T1 N0<br>M0 | III | -    |
| 32 | 57 | M | + | - | - | + | + | - | + | primary<br>HCC | T3 N2<br>M0 | III | +++  |
| 33 | 40 | M | + | - | - | + | + | - | + | primary<br>HCC | T3 N1<br>M0 | III | -    |
| 34 | 31 | M | + | - | - | + | + | - | + | primary<br>HCC | T1 N0<br>M0 | III | ++++ |
| 35 | 52 | M | + | - | - | + | + | - | + | primary<br>HCC | T1 N0<br>M0 | III | ++++ |
| 36 | 70 | F | - | - | - | - | - | - | + | primary<br>HCC | T1 N0<br>M0 | III | ++   |
| 37 | 32 | F | + | - | - | + | + | - | - | primary<br>HCC | T3 N1<br>M0 | III | -    |
| 38 | 45 | M | + | - | - | + | + | - | + | primary<br>HCC | T2 N0<br>M0 | III | ++++ |
| 39 | 51 | M | - | - | - | - | - | - | + | primary<br>HCC | T3 N1<br>M0 | III | ++++ |

|    |    |   |   |   |   |   |   |   |   |                |             |     |      |
|----|----|---|---|---|---|---|---|---|---|----------------|-------------|-----|------|
| 40 | 42 | M | + | - | - | + | + | - | + | primary<br>HCC | T1 N0<br>M0 | II  | ++++ |
| 41 | 71 | F | + | - | - | + | + | - | + | primary<br>HCC | T1 N0<br>M0 | II  | -    |
| 42 | 55 | M | + | - | - | + | + | - | + | primary<br>HCC | T1 N0<br>M0 | II  | ++++ |
| 43 | 48 | M | + | - | - | + | + | - | + | primary<br>HCC | T1 N0<br>M0 | III | ++++ |
| 44 | 50 | M | + | - | - | + | + | - | + | primary<br>HCC | T3 N1<br>M0 | III | +    |
| 45 | 41 | M | + | - | - | + | + | - | + | primary<br>HCC | T3 N2<br>M0 | III | ++++ |
| 46 | 65 | M | + | + | - | + | - | - | + | primary<br>HCC | T1 N0<br>M0 | III | ++++ |
| 47 | 52 | M | + | - | - | + | + | - | + | primary<br>HCC | T1 N0<br>M0 | II  | -    |
| 48 | 35 | M | + | - | - | + | + | - | + | primary<br>HCC | T1 N0<br>M0 | I   | +    |
| 49 | 55 | M | + | - | - | + | + | - | + | primary<br>HCC | T2 N0<br>M0 | III | ++++ |
| 50 | 20 | M | + | - | - | + | + | - | - | primary<br>HCC | T3 N3<br>M0 | III | ++++ |
| 51 | 48 | M | + | - | - | + | + | - | + | primary<br>HCC | T2 N0<br>M0 | III | ++++ |
| 52 | 40 | M | + | - | - | + | + | - | + | primary<br>HCC | T2 N0<br>M0 | II  | ++++ |
| 53 | 58 | M | - | - | - | + | + | - | + | primary<br>HCC | T3 N3<br>M0 | II  | ++   |
| 54 | 59 | M | + | - | + | + | - | - | + | primary<br>HCC | T1 N0<br>M0 | II  | ++++ |
| 55 | 31 | F | + | - | - | + | + | - | - | primary<br>HCC | T1 N0<br>M0 | II  | -    |
| 56 | 31 | M | + | - | - | + | + | - | + | primary<br>HCC | T1 N0<br>M0 | III | ++   |
| 57 | 70 | M | + | - | - | + | + | - | + | primary<br>HCC | T1 N0<br>M0 | II  | -    |
| 58 | 45 | M | + | - | - | + | + | - | + | primary<br>HCC | T3 N1<br>M0 | II  | +    |
| 59 | 60 | F | + | - | - | + | + | - | + | primary<br>HCC | T1 N0<br>M0 | III | +++  |
| 60 | 60 | M | + | - | - | + | + | - | + | primary<br>HCC | T3 N1<br>M0 | II  | +    |
| 61 | 54 | M | + | - | - | + | + | - | + | primary<br>HCC | T3 N1<br>M0 | II  | +    |

|    |    |   |   |   |   |   |   |   |   |                |             |     |      |
|----|----|---|---|---|---|---|---|---|---|----------------|-------------|-----|------|
| 62 | 60 | M | + | - | - | + | + | - | + | primary<br>HCC | T1 N0<br>M0 | III | ++++ |
| 63 | 45 | M | + | - | - | + | + | - | + | primary<br>HCC | T3 N2<br>M0 | II  | -    |
| 64 | 52 | M | - | + | - | - | + | - | + | primary<br>HCC | T3 N1<br>M0 | III | +++  |
| 65 | 46 | M | + | - | - | + | + | - | + | primary<br>HCC | T1 N0<br>M0 | I   | ++   |
| 66 | 53 | M | + | - | - | + | + | - | - | primary<br>HCC | T1 N0<br>M0 | II  | ++++ |
| 67 | 60 | M | - | + | - | - | + | - | + | primary<br>HCC | T4 N0<br>M0 | II  | -    |
| 68 | 58 | F | + | - | - | + | + | - | - | primary<br>HCC | T3 N1<br>M0 | II  | -    |
| 69 | 40 | M | + | - | - | + | + | - | + | primary<br>HCC | T3 N1<br>M0 | III | -    |
| 70 | 40 | M | + | - | - | + | + | - | - | primary<br>HCC | T4 N0<br>M0 | II  | ++++ |
| 71 | 56 | M | + | - | - | + | + | - | - | primary<br>HCC | T1 N0<br>M0 | II  | ++++ |
| 72 | 46 | M | + | - | - | + | + | - | - | primary<br>HCC | T2 N0<br>M0 | III | ++++ |
| 73 | 46 | M | + | - | - | + | + | - | - | primary<br>HCC | T2 N0<br>M0 | III | ++++ |
| 74 | 35 | M | + | - | - | + | + | - | + | primary<br>HCC | T2 N0<br>M0 | III | -    |
| 75 | 51 | M | + | - | + | - | + | - | - | primary<br>HCC | T2 N0<br>M0 | III | -    |
| 76 | 44 | M | + | - | - | + | + | - | + | primary<br>HCC | T1 N0<br>M0 | III | ++++ |
| 77 | 57 | M | + | - | - | + | + | - | - | primary<br>HCC | T1 N0<br>M0 | III | +    |
| 78 | 39 | M | + | - | + | - | + | - | + | primary<br>HCC | T2 N0<br>M0 | III | ++++ |
| 79 | 68 | M | + | - | - | + | + | - | + | primary<br>HCC | T2 N0<br>M0 | III | ++++ |
| 80 | 57 | M | + | - | - | + | + | - | - | primary<br>HCC | T2 N0<br>M0 | III | -    |
| 81 | 40 | M | + | - | + | - | + | - | - | primary<br>HCC | T2 N0<br>M0 | III | +    |
| 82 | 50 | M | + | - | - | + | + | - | + | primary<br>HCC | T2 N0<br>M0 | III | ++++ |
| 83 | 37 | M | + | - | - | + | + | - | + | primary<br>HCC | T1 N0<br>M0 | III | -    |

|     |    |   |   |   |   |   |   |   |   |                |             |     |      |
|-----|----|---|---|---|---|---|---|---|---|----------------|-------------|-----|------|
| 84  | 63 | M | + | - | - | + | + | - | + | primary<br>HCC | T1 N0<br>M0 | III | ++   |
| 85  | 39 | M | + | - | - | + | + | - | + | primary<br>HCC | T3 N0<br>M0 | III | -    |
| 86  | 46 | M | + | - | - | + | + | - | - | primary<br>HCC | T2 N0<br>M0 | III | -    |
| 87  | 44 | M | + | - | - | + | + | - | + | primary<br>HCC | T1 N0<br>M0 | II  | -    |
| 88  | 62 | M | + | - | - | + | + | - | + | primary<br>HCC | T2 N0<br>M0 | II  | ++   |
| 89  | 35 | M | + | - | - | + | + | - | + | primary<br>HCC | T2 N0<br>M0 | III | -    |
| 90  | 53 | M | + | - | - | + | + | - | + | primary<br>HCC | T1 N0<br>M0 | II  | -    |
| 91  | 57 | M | + | - | - | + | + | - | + | primary<br>HCC | T2 N0<br>M0 | III | -    |
| 92  | 37 | M | + | - | - | + | + | - | + | primary<br>HCC | T2 N0<br>M0 | III | +++  |
| 93  | 53 | M | + | - | - | + | + | - | + | primary<br>HCC | T2 N0<br>M0 | III | +    |
| 94  | 51 | M | + | - | - | + | + | - | + | primary<br>HCC | T2 N0<br>M0 | III | +    |
| 95  | 72 | M | - | + | - | - | + | - | - | primary<br>HCC | T1 N0<br>M0 | III | -    |
| 96  | 63 | F | + | - | - | + | + | - | + | primary<br>HCC | T1 N0<br>M0 | III | -    |
| 97  | 52 | M | - | - | - | + | + | - | - | primary<br>HCC | T3 N0<br>M0 | III | -    |
| 98  | 43 | M | + | - | - | + | + | - | + | primary<br>HCC | T2 N0<br>M0 | III | ++++ |
| 99  | 44 | M | + | - | - | + | + | - | + | primary<br>HCC | T2 N0<br>M0 | III | ++++ |
| 100 | 36 | M | + | - | - | + | + | - | - | primary<br>HCC | T2 N0<br>M0 | III | ++++ |
| 101 | 49 | M | + | - | - | + | + | - | + | primary<br>HCC | T3 N0<br>M0 | III | -    |
| 102 | 40 | M | + | - | - | + | + | - | - | primary<br>HCC | T1 N0<br>M0 | III | ++++ |
| 103 | 32 | M | + | - | - | + | + | - | - | primary<br>HCC | T2 N0<br>M0 | III | ++++ |
| 104 | 58 | M | + | - | - | + | + | - | + | primary<br>HCC | T2 N0<br>M0 | III | ++++ |
| 105 | 57 | M | + | - | - | + | + | - | + | primary<br>HCC | T2 N0<br>M0 | III | ++++ |

|     |    |   |   |   |   |   |   |   |   |                |             |     |      |
|-----|----|---|---|---|---|---|---|---|---|----------------|-------------|-----|------|
| 106 | 39 | M | + | - | + | - | + | - | - | primary<br>HCC | T3 N0<br>M0 | III | ++++ |
| 107 | 59 | M | + | - | - | + | + | - | + | primary<br>HCC | T2 N0<br>M0 | III | ++   |
| 108 | 55 | M | + | - | - | - | + | - | - | primary<br>HCC | T2 N0<br>M0 | III | +    |
| 109 | 50 | M | + | - | + | - | + | - | - | primary<br>HCC | T3 N1<br>M0 | III | ++++ |
| 110 | 39 | M | + | - | - | + | + | - | + | primary<br>HCC | T1 N0<br>M0 | I   | ++   |
| 111 | 58 | M | - | - | - | - | - | - | - | primary<br>HCC | T3 N1<br>M0 | III | -    |
| 112 | 30 | M | + | - | + | - | + | - | - | primary<br>HCC | T1 N0<br>M0 | II  | -    |
| 113 | 61 | M | + | - | - | + | + | - | + | primary<br>HCC | T1 N0<br>M0 | I   | -    |
| 114 | 54 | M | + | - | - | + | + | - | + | primary<br>HCC | T1 N0<br>M0 | III | +    |
| 115 | 28 | M | + | - | - | + | + | - | + | primary<br>HCC | T1 N0<br>M0 | II  | ++   |
| 116 | 42 | M | + | - | - | + | + | - | - | primary<br>HCC | T1 N0<br>M0 | II  | -    |
| 117 | 49 | M | + | - | + | - | + | - | + | primary<br>HCC | T2 N0<br>M0 | III | +    |
| 118 | 45 | M | + | - | - | + | + | - | + | primary<br>HCC | T1 N0<br>M0 | III | ++++ |
| 119 | 47 | M | + | - | - | + | + | - | - | primary<br>HCC | T1 N0<br>M0 | I   | ++++ |
| 120 | 48 | M | + | - | + | - | + | - | + | primary<br>HCC | T1 N0<br>M0 | III | -    |
| 121 | 35 | M | - | - | - | - | - | - | + | primary<br>HCC | T1 N0<br>M0 | II  | ++++ |
| 122 | 63 | F | - | - | - | - | - | - | + | primary<br>HCC | T3 N1<br>M0 | III | -    |
| 123 | 36 | M | + | - | - | + | + | - | + | primary<br>HCC | T3 N1<br>M0 | II  | ++++ |
| 124 | 35 | M | + | - | - | + | + | - | + | primary<br>HCC | T3 N1<br>M0 | II  | -    |
| 125 | 37 | M | + | - | - | + | + | - | + | primary<br>HCC | T1 N0<br>M0 | II  | ++   |
| 126 | 44 | F | + | - | - | + | + | - | + | primary<br>HCC | T3 N3<br>M0 | III | ++++ |
| 127 | 67 | M | + | - | - | + | + | - | + | primary<br>HCC | T1 N0<br>M0 | II  | -    |

|     |    |   |   |   |   |   |   |   |   |                |             |     |      |
|-----|----|---|---|---|---|---|---|---|---|----------------|-------------|-----|------|
| 128 | 46 | M | + | - | - | + | + | - | + | primary<br>HCC | T3 N3<br>M0 | II  | ++++ |
| 129 | 46 | M | + | - | + | - | + | - | - | primary<br>HCC | T2 N0<br>M0 | III | ++   |
| 130 | 47 | M | + | - | - | + | + | - | + | primary<br>HCC | T3 N1<br>M0 | III | ++++ |
| 131 | 41 | M | + | - | + | - | + | - | + | primary<br>HCC | T2 N0<br>M0 | II  | -    |
| 132 | 42 | M | + | - | + | - | + | - | - | primary<br>HCC | T3 N0<br>M0 | I   | -    |
| 133 | 38 | M | + | - | - | + | + | - | + | primary<br>HCC | T1 N0<br>M0 | II  | ++++ |
| 134 | 55 | M | + | - | + | - | + | - | - | primary<br>HCC | T1 N0<br>M0 | II  | ++   |
| 135 | 68 | M | + | - | - | + | + | - | + | primary<br>HCC | T1 N0<br>M0 | III | -    |
| 136 | 36 | M | + | - | - | + | + | - | + | primary<br>HCC | T1 N0<br>M0 | II  | -    |
| 137 | 78 | F | - | - | - | - | - | - | + | primary<br>HCC | T1 N0<br>M0 | II  | -    |
| 138 | 48 | M | + | - | - | + | + | - | + | primary<br>HCC | T1 N0<br>M0 | III | +    |
| 139 | 43 | F | - | - | - | - | - | - | - | primary<br>HCC | T1 N0<br>M0 | II  | -    |
| 140 | 50 | M | + | - | - | + | + | - | - | primary<br>HCC | T1 N0<br>M0 | II  | -    |
| 141 | 58 | M | + | - | - | + | + | - | - | primary<br>HCC | T1 N0<br>M0 | II  | -    |
| 142 | 37 | M | + | - | - | + | + | - | - | primary<br>HCC | T1 N0<br>M0 | II  | -    |

Abbreviations: HBV, hepatitis B virus; HCV, hepatitis C virus; HCC, hepatocellular carcinoma; P, patient; HBsAg, hepatitis B surface antigen; HBsAb, antibody against HBsAg; HBeAg, hepatitis B e antigen; HBeAb, antibody against HBeAg; HBcAb, antibody against hepatitis B core antigen; TNM, tumor-node-metastasis; AFP, alpha-fetoprotein; M, male; F, female.

**Supplementary Table 2. Sequences of RNA Oligonucleotides and Primers Used**

| <b>Name</b>                      | <b>Primer Sequence (5'-3')</b>                 |
|----------------------------------|------------------------------------------------|
| <b>miRNA Duplexes</b>            |                                                |
| miR-99a sense strand             | AACCCGUAGAUCCGAUCUUGUG                         |
| miR-99a antisense strand         | CAAGAUCGGAUCUACGGGUUUU                         |
| NC sense strand                  | UUCUCCGAACGUGUCACGUTT                          |
| NC antisense strand              | ACGUGACACGUUCGGAGAATT                          |
| <b>Primers for 3'UTR Cloning</b> |                                                |
| mTOR 3'UTR F                     | CGACGCGTGGAGGCCAGATGTGCCCATC                   |
| mTOR 3'UTR R                     | GGGTTTAAACATGTTTAAAATTCTGATGTCATTTATTGG        |
| IGF-1R 3'UTR F                   | CGACGCGTGGATCCTGGCACAGAGAAGAGTTAC              |
| IGF-1R 3'UTR R                   | GGGTTTAAACGTGCCATGCACTGCTGGGCTCC               |
| FGFR3 3'UTR F                    | CGACGCGTCCCAACAATGTGAGGGGTCCCTAGC              |
| FGFR3 3'UTR R                    | AGCTTTGTTTAAACCGGAAAGTTCGTCGCTGGGTTAACAA       |
| FZD5 3'UTR F                     | CGACGCGTCCTGTTTCCATCCATATACTTACTTCCCCCA        |
| FZD5 3'UTR R                     | AGCTTTGTTTAAACCTCATCAAGCTGCTCTGGGTTTCCTTTTG    |
| FZD8 3'UTR F                     | GGACTAGTCGAGGAGAGCCAAGTGCAGCGAAG               |
| FZD8 3'UTR R                     | AGCTTTGTTTAAACCAGGGTTTTGAAACCTTTAGTGATACCATGCA |
| <b>Primers for RT-PCR</b>        |                                                |
| U6 F                             | GTGGACCGCACAAGCTCGCT                           |
| U6 R                             | TTGTTGAACGGCACTGTGTATAGCA                      |
| $\beta$ -actin F                 | CTCGCTTCGGCAGCACA                              |
| $\beta$ -actin R                 | AACGCTTCACGAATTTGCGT                           |
| pri-miR-99a F                    | AGTGTGACGTTGACATCCGT                           |
| pri-miR-99a R                    | GCAGCTCAGTAACAGTCCGC                           |
| C21orf34 F                       | TTTGCTTCAAACGACAACAAGAG                        |
| C21orf34 R                       | TTCGAGCATGGCCGGATTG                            |

Abbreviations: NC, negative control; RT, reverse-transcription; F, forward primer; R, reverse primer.



**Supplementary Table 3. Enrichment Analysis of Predicted miR-99a Targets in KEGG Cell Signaling Pathway Database.**

| Pathway                                 | Count | <i>P</i> value |
|-----------------------------------------|-------|----------------|
| Pathways in cancer                      | 9     | 0.015187       |
| Metabolic pathways                      | 9     | 0.913787       |
| MAPK signaling pathway                  | 7     | 0.042937       |
| Chemokine signaling pathway             | 6     | 0.027574       |
| Leukocyte transendothelial migration    | 5     | 0.014499       |
| Jak-STAT signaling pathway              | 5     | 0.036139       |
| Cytokine-cytokine receptor interaction  | 5     | 0.081776       |
| Focal adhesion                          | 5     | 0.093158       |
| Long-term potentiation                  | 4     | 0.011716       |
| Colorectal cancer                       | 4     | 0.017167       |
| Progesterone-mediated oocyte maturation | 4     | 0.040815       |
| Cell adhesion molecules (CAMs)          | 4     | 0.073579       |
| Wnt signaling pathway                   | 4     | 0.104772       |

Only the top 5 enriched cell signaling pathways of predicted miR-99a targets in KEGG database were shown. A hypergeometric test was used to validate the significance with indicated *P* value.

Supplementary Figure 1

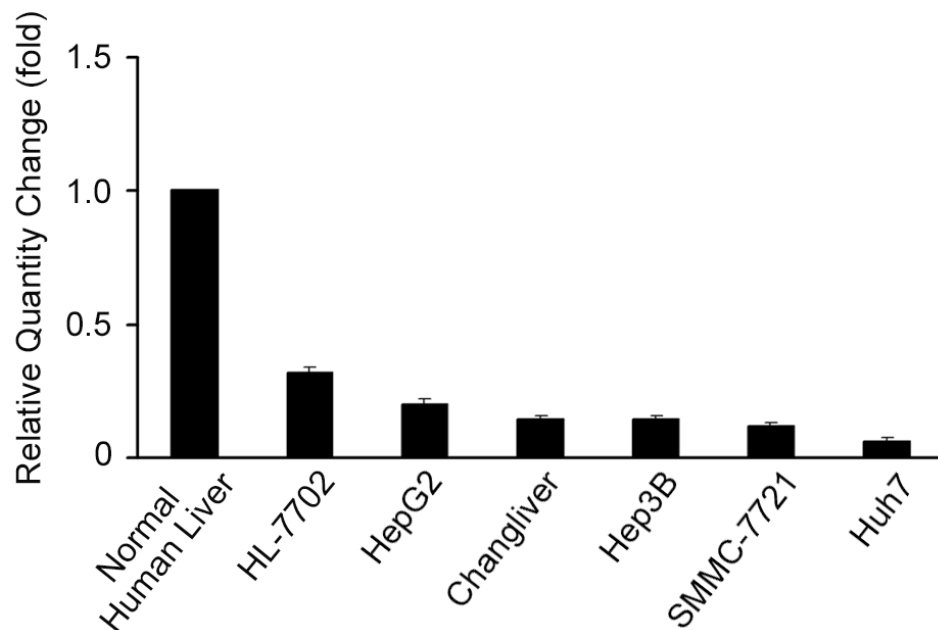

**Supplementary Figure 1. Expression of miR-99a in human liver tissue and cell lines.** The mature miR-99a expression was analyzed by real-time qRT-PCR in normal human liver tissue and the indicated human liver cell line (HL-7702) or HCC cell lines (HepG2, Changliver, Hep3B, SMMC-7721, Huh7). The normalized miR-99a expression in normal human liver tissue in each experiment was set as relative 1. Data are shown as mean  $\pm$  s.d. (n = 4) of one representative experiment. Similar results were obtained in at least three independent experiments.

Supplementary Figure 2

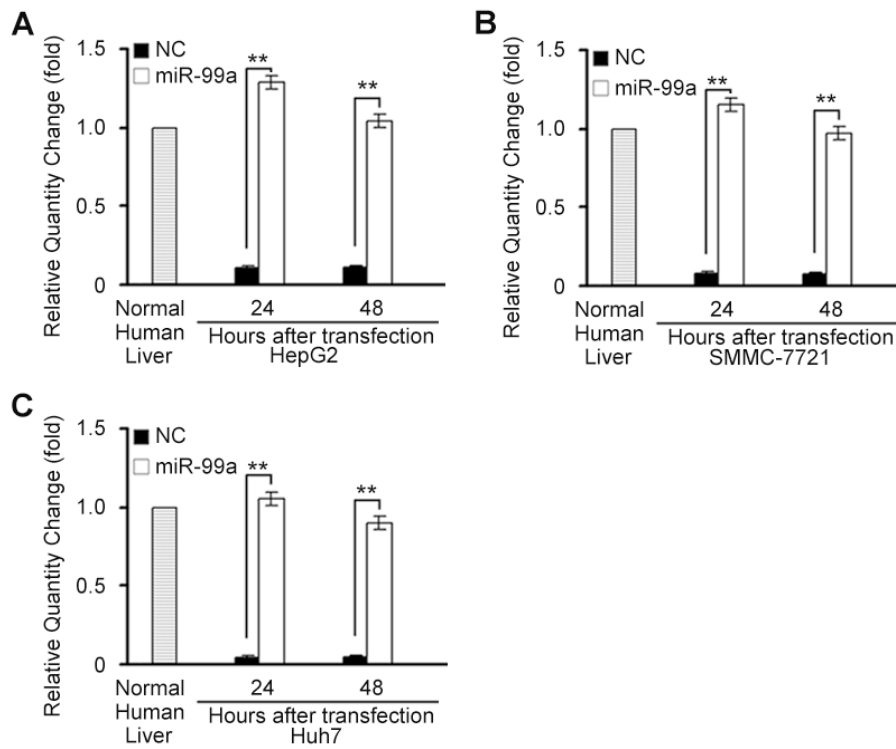

**Supplementary Figure 2. Restoration efficiency of miR-99a in HCC cell lines.** HepG2, SMMC-7721 and Huh7 cells were transfected with miR-99a or NC mimics. miR-99a expression was analyzed by real-time qRT-PCR 24 or 48 hours after transfection. The normalized miR-99a expression in normal human liver tissue in each experiment was set as relative 1. Data are shown as mean  $\pm$  s.d. ( $n = 4$ ) of one representative experiment. Similar results were obtained in at least three independent experiments. \*\*,  $P < 0.01$ .

Supplementary Figure 3

|              |    |                         |      |
|--------------|----|-------------------------|------|
|              |    | 294                     | 300  |
| mTOR 3'UTR   | 5' | CCAUAACUUUAGAAAUACGGGUU | 3'   |
| miR-99a      | 3' | GUGUUCUAGCCUAGAUGCCCAA  | 5'   |
|              |    |                         |      |
| Mutant 3'UTR | 5' | CCAUAACUUUAGAAAUGCCCAU  | 3'   |
|              |    |                         |      |
|              |    | 5597                    | 5603 |
| IGF-1R 3'UTR | 5' | UUAAGUCCAGUAGAUUACGGGUA | 3'   |
| miR-99a      | 3' | GUGUUCUAGCCUAGAUGCCCAA  | 5'   |
|              |    |                         |      |
| Mutant 3'UTR | 5' | UUAAGUCCAGUAGAUUAGCCCAA | 3'   |
|              |    | 537                     | 543  |
| FGFR3 3'UTR  | 5' | CUCAGAGACUGAAAUACGGGUA  | 3'   |
| miR-99a      | 3' | GUGUUCUAGCCUAGAUGCCCAA  | 5'   |
|              |    |                         |      |
|              |    | 3830                    | 3836 |
| FZD5 3'UTR   | 5' | UUUGGUGACUUUUGAUACGGGUU | 3'   |
| miR-99a      | 3' | GUGUUCUAGCCUAGAUGCCCAA  | 5'   |
|              |    |                         |      |
|              |    | 543                     | 549  |
| FZD8 3'UTR   | 5' | UACACCCCACGUAAAUACGGGUU | 3'   |
| miR-99a      | 3' | GUGUUCUAGCCUAGAUGCCCAA  | 5'   |
|              |    |                         |      |

**Supplementary Figure 3. TargetScan prediction of miR-99a pairing site and mutated sequence in the complementary site for the seed region.**

Supplementary Figure 4

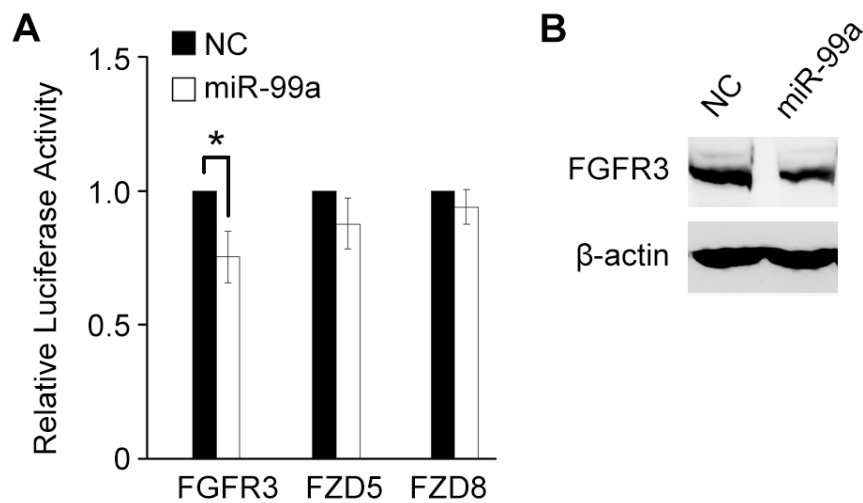

**Supplementary Figure 4. Putative targets of miR-99a.** (A) Analysis of luciferase activity. HepG2 cells were co-transfected with indicated RNA duplex, pRL-TK and pMIR-Report firefly luciferase reporter plasmid containing wild-type 3'-UTR of putative target gene. After 24 hours, firefly luciferase activity was measured and normalized by Renilla luciferase activity. The normalized luciferase activity of NC-transfectant in each experiment was set as relative luciferase activity 1. Data are shown as mean  $\pm$  s.d. (n = 4) of one representative experiment. Similar results were obtained in at least three independent experiments. \*, P < 0.05. (B) Restoration of miR-99a reduces protein level of FGFR3. FGFR3 expression in HepG2 cells was analyzed by Western blotting 60 hours after transfection with miR-99a or NC mimics.

Supplementary Figure 5

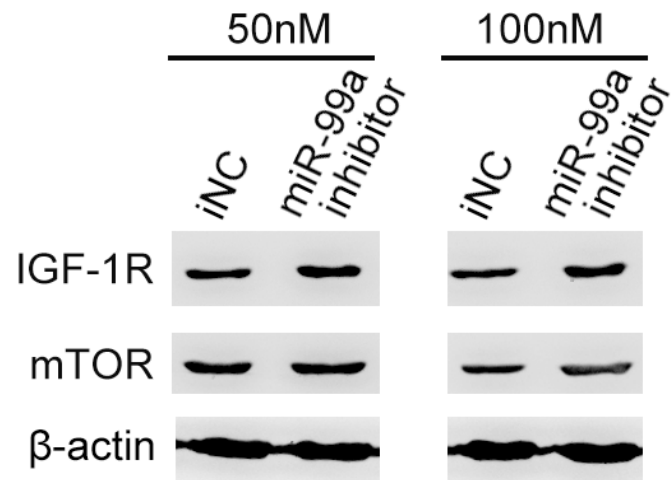

**Supplementary Figure 5. Effects of knocking down miR-99a in HL-7702 cells.** HL-7702 cells were transfected with miR-99a inhibitor or inhibitor NC (iNC) at the indicated concentration. Expression of IGF-1R and mTOR were analyzed by Western blotting 60 hours after transfection.

Supplementary Figure 6

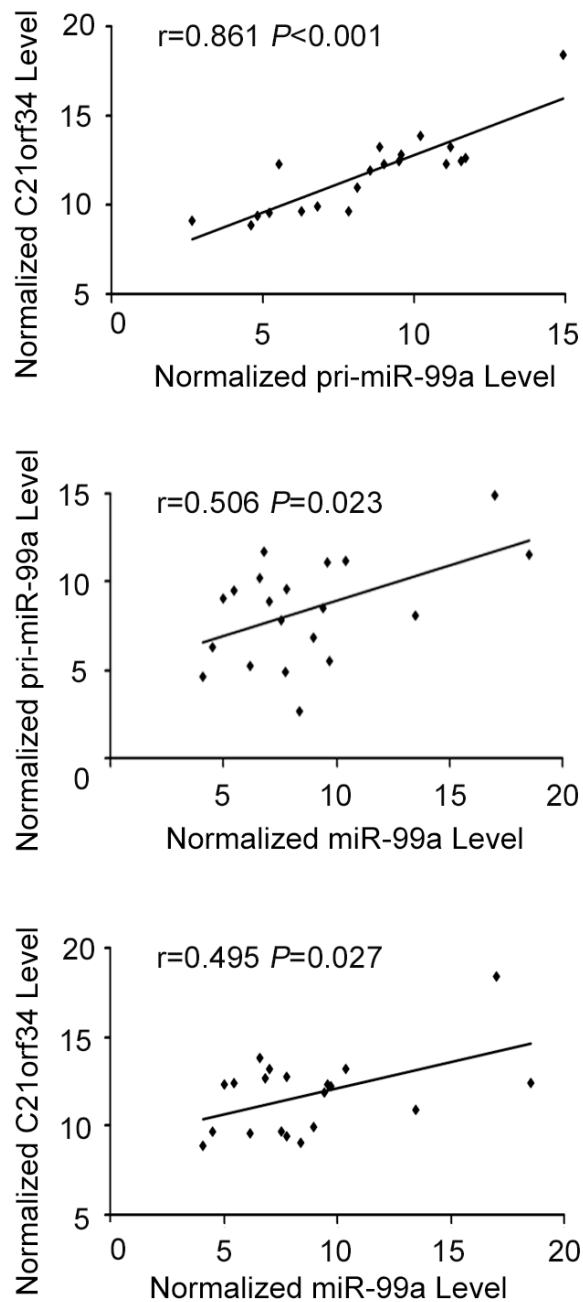

**Supplementary Figure 6. Positive correlation between expression of mature miR-99a, primary miR-99a and C21orf34 in HCC and matching liver tissues.** RNA levels of mature miR-99a, primary miR-99a (pri-miR-99a) and the host gene C21orf34 in HCC and matching liver tissues (n=20) were detected by qRT-PCR. The mature miR-99a level was normalized to U6 expression, while C21orf34 and pri-miR-99a were normalized to  $\beta$ -actin expression. Statistical analysis was performed using Pearson's correlation coefficient. Each data was expressed with a log<sub>2</sub> scale.
